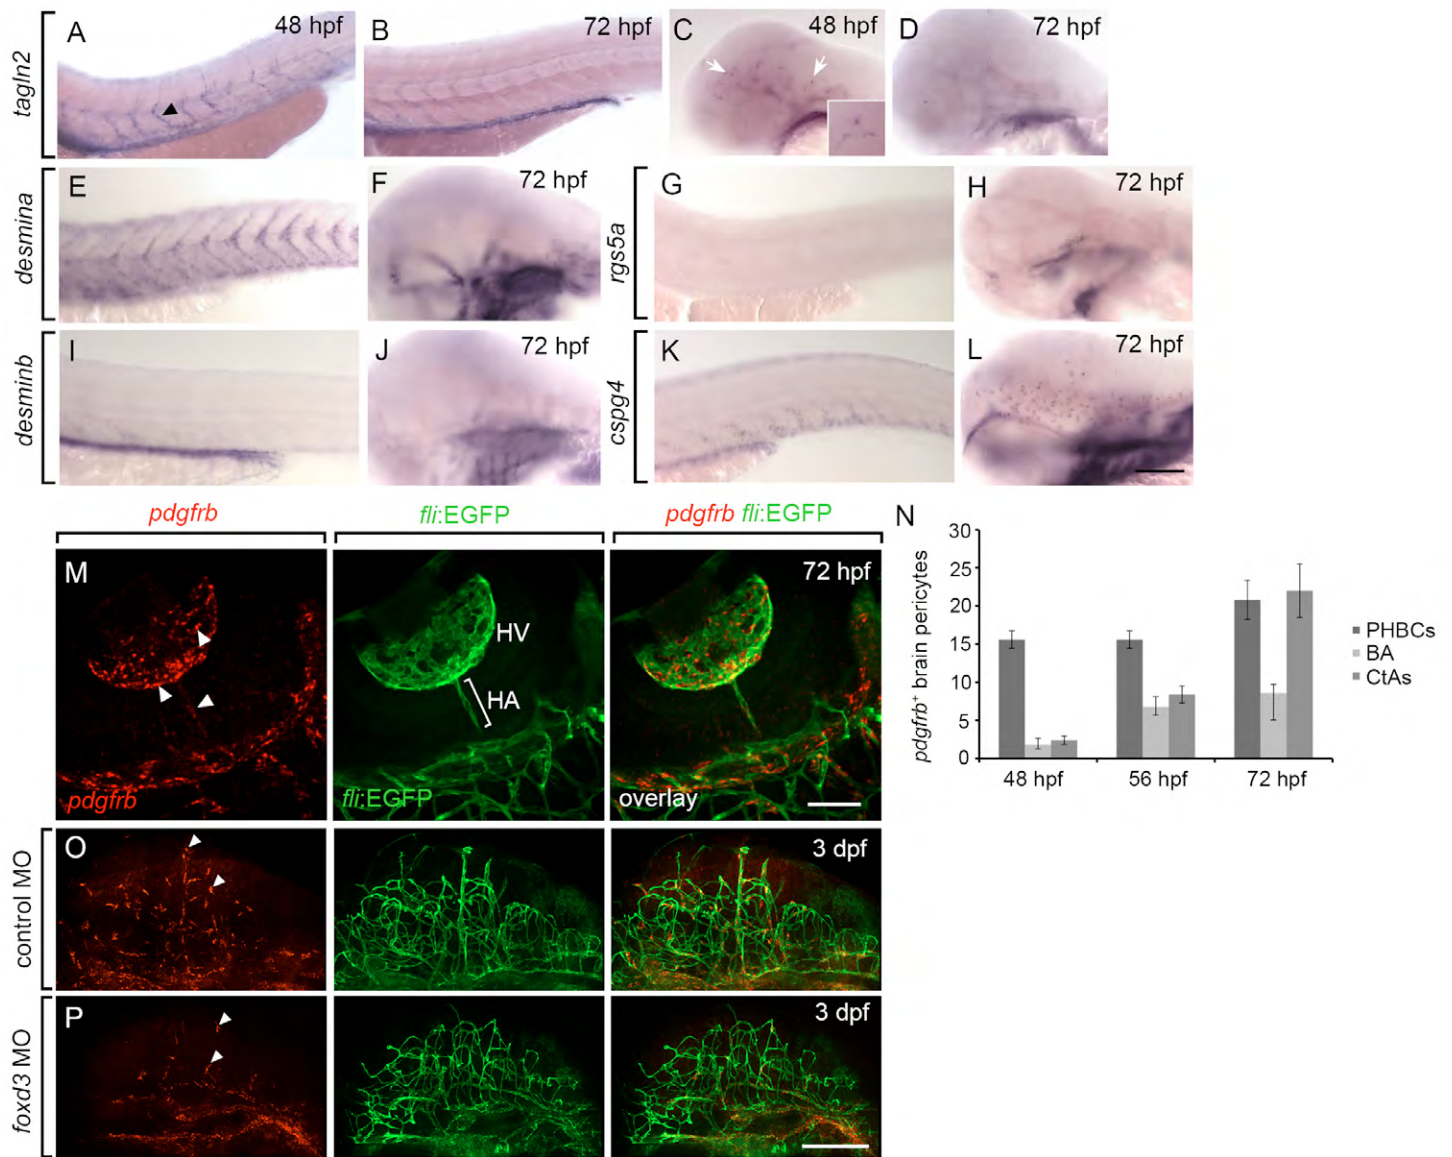

**Fig. S1. Expression patterns of *tagln2* and *pdgfrb* in zebrafish embryos and larvae.** (A-C) ISH for *tagln2*. (A,B) *tagln2* expression in trunk vessels at 48 hpf and 72 hpf, respectively. Arrowhead, *tagln2*<sup>+</sup> putative mural cell in ISV. (C,D) *tagln2* expression in brain vasculature at 48 hpf and 72 hpf. Arrow, *tagln2*<sup>+</sup> putative brain mural cell. Inset, high magnification view of *tagln2*<sup>+</sup> cells in the brain. (E-L) *desmina*, *desminb*, *rgs5a*, and *cspg4* expression in trunk and brain vasculature at 72 hpf. (E,G,I,K) trunk expression. (F,H,J,L) brain expression. (M) Fluorescent ISH showing *pdgfrb* expression in retinal pericytes at 72 hpf. Arrowheads, *pdgfrb*<sup>+</sup> retinal pericytes. (N) Quantification of *pdgfrb*<sup>+</sup> pericytes associated with different hindbrain vessels at various time points. (O,P) *foxd3* MO knock-down caused reduction in *pdgfrb*<sup>+</sup> brain pericyte number. (O) Control MO-injected 72 hpf larva. (P) *foxd3* MO-injected 72 hpf larva. Arrowheads, *pdgfrb*<sup>+</sup> brain pericytes. HA, hyaloid artery; HV, hyaloid vessels. Scale bars: (A-L) 0.5 mm, (M-P) 200  $\mu$ m.

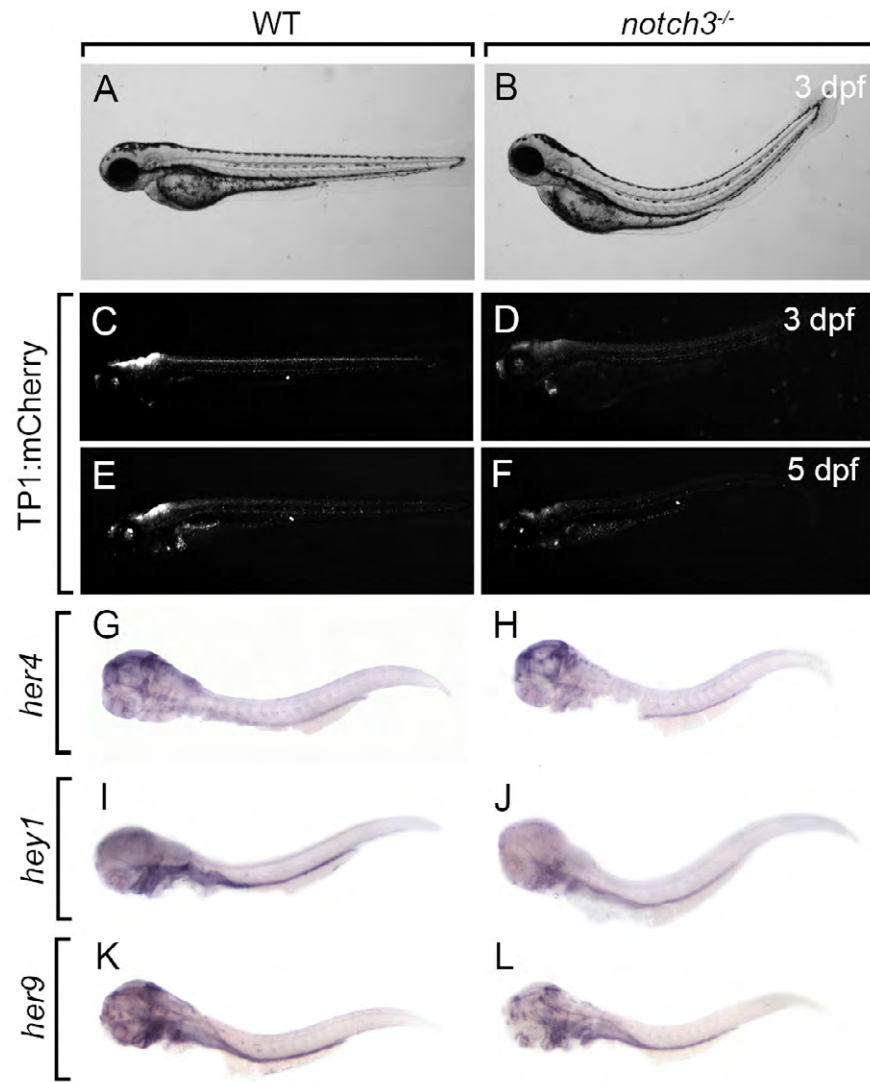

**Fig. S2. *notch3*<sup>fh332</sup> mutants have reduced Notch signaling activity.** (A,B) Wild-type and *notch3*<sup>fh332</sup> mutant larvae showing trunk curvature of the mutant at 3 dpf. (C-F) *notch3*<sup>fh332</sup>; *Tg(Tp1bglob:hmgbl-mCherry)* (Tp1:mCherry) mutant larvae showed reduced mCherry expression compared to wild-type siblings at 3 dpf and 5 dpf. (G,H) Whole-mount ISH revealed similar *her4.1* expression in *notch3*<sup>fh332</sup> mutant and wild-type sibling. (I-L) *notch3*<sup>fh332</sup> mutants showed reduced *hey1* and *her9* expression compared to wild-type siblings.

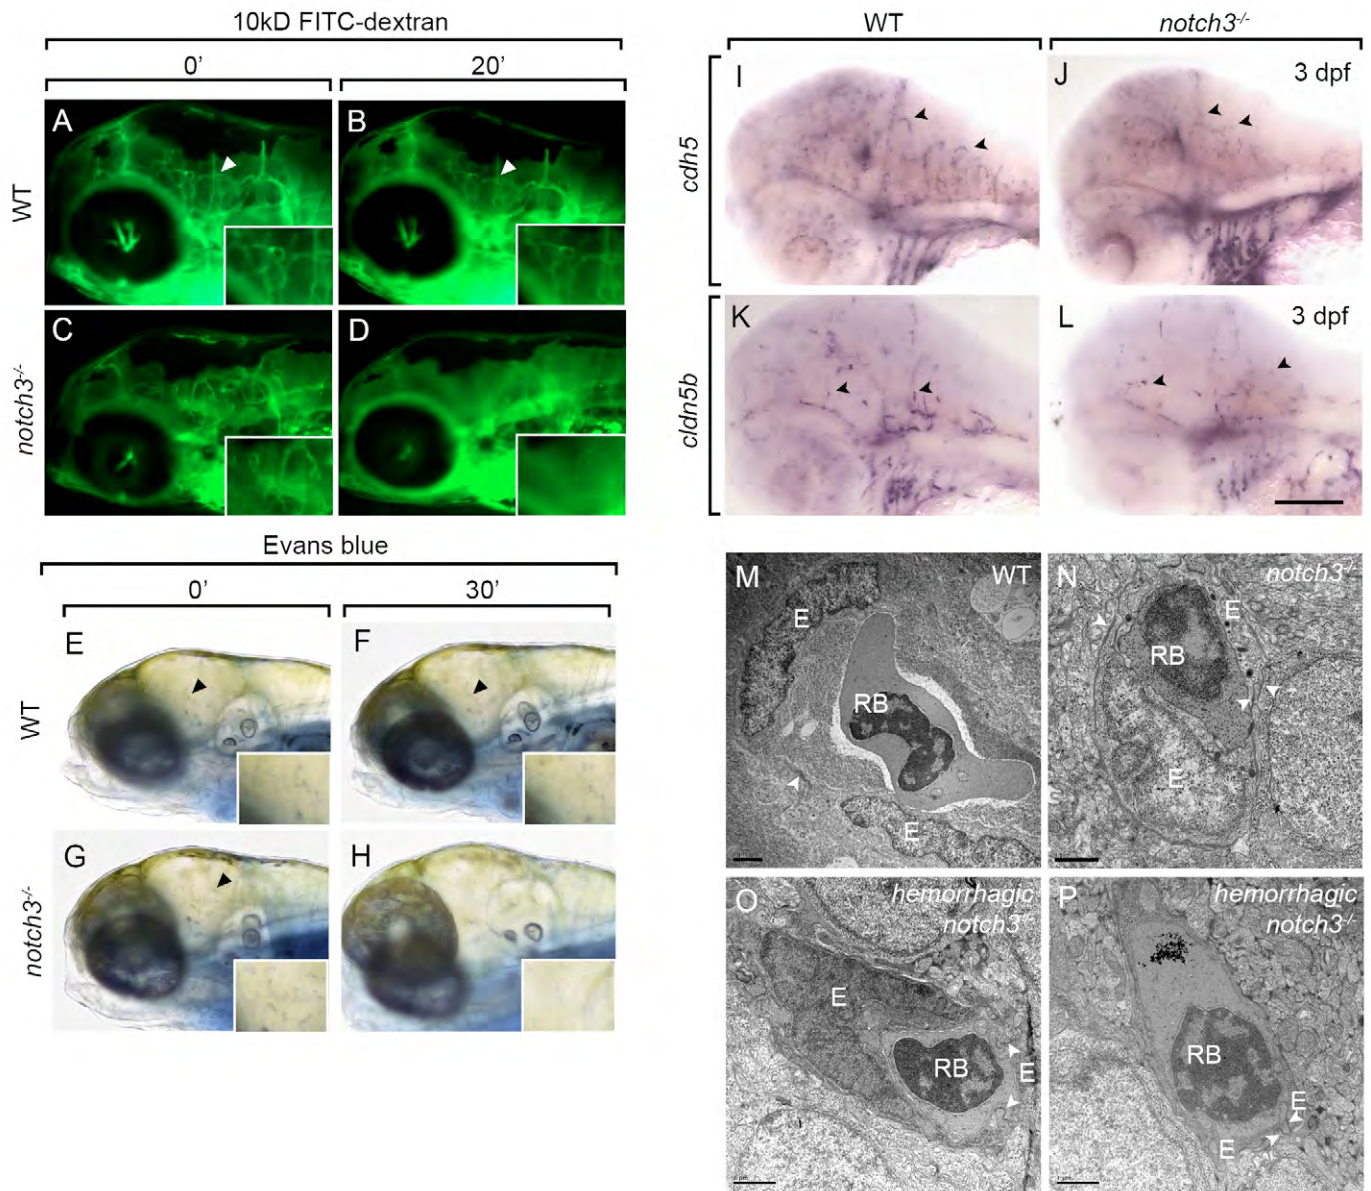

**Fig. S3. Endothelial cell differentiation in *notch3*<sup>h332</sup> mutant larvae.** (A-H) Representative results of BBB assay in 4 dpf wild-type and mutant larvae using 10kD FITC-dextran and Evans blue dye. Insets, higher magnification view of brain microvessels. (A-D) Mutant embryos failed to retain 10kD FITC-dextran in the brain microvessels 20 min after the injection. (E-H) Mutant embryos failed to retain Evans blue dye in the brain microvessels 30 min after the injection. (I-L) ISH showing *cdh5* and *cldn5b* expression in the brain of 3 dpf wild-type and *notch3*<sup>h332</sup> larvae. Arrowheads, endothelial expression of *cdh5* or *cldn5b*. (M-P) Electron microscopy images of brain microvessels in 4 dpf wild-type and *notch3*<sup>h332</sup> mutant larvae. RB, red blood cell. E, endothelial cell. Arrowheads, endothelial tight junctions. Scale bars: (I-L) 250  $\mu$ m, (M-P) 1  $\mu$ m.



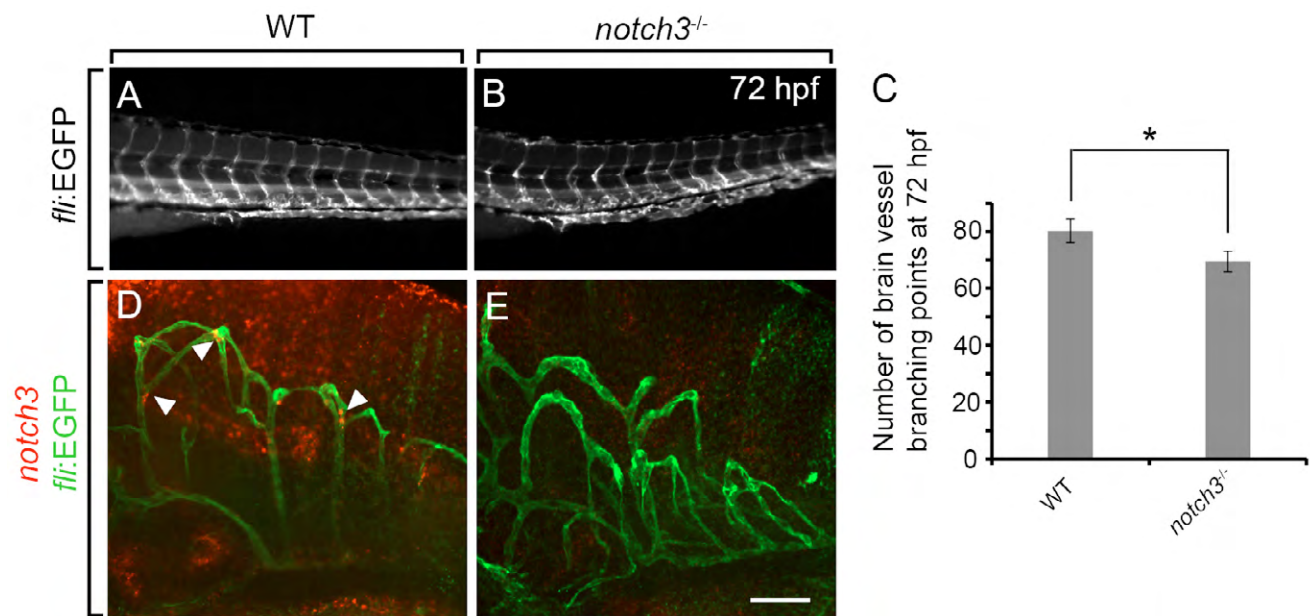

**Fig. S4. Vascular morphogenesis and brain *notch3* expression in *notch3<sup>fh332</sup>* mutants.** (A,B) *fli:EGFP* transgenic reporter expression showing trunk vessels in 72 hpf wild-type and *notch3<sup>fh332</sup>* mutant larvae. (C) Quantification of vessel branch points in the brain of *notch3<sup>fh332</sup>* mutant and wild-type larvae. (D,E) Fluorescent ISH showing *notch3* expression in the hindbrain. Pericyte *notch3* expression was largely depleted in the mutant. Arrowheads, *notch3<sup>+</sup>* pericytes. \**P* < 0.01 by Student's 2-tailed t test. Scale bar, 200  $\mu$ m.

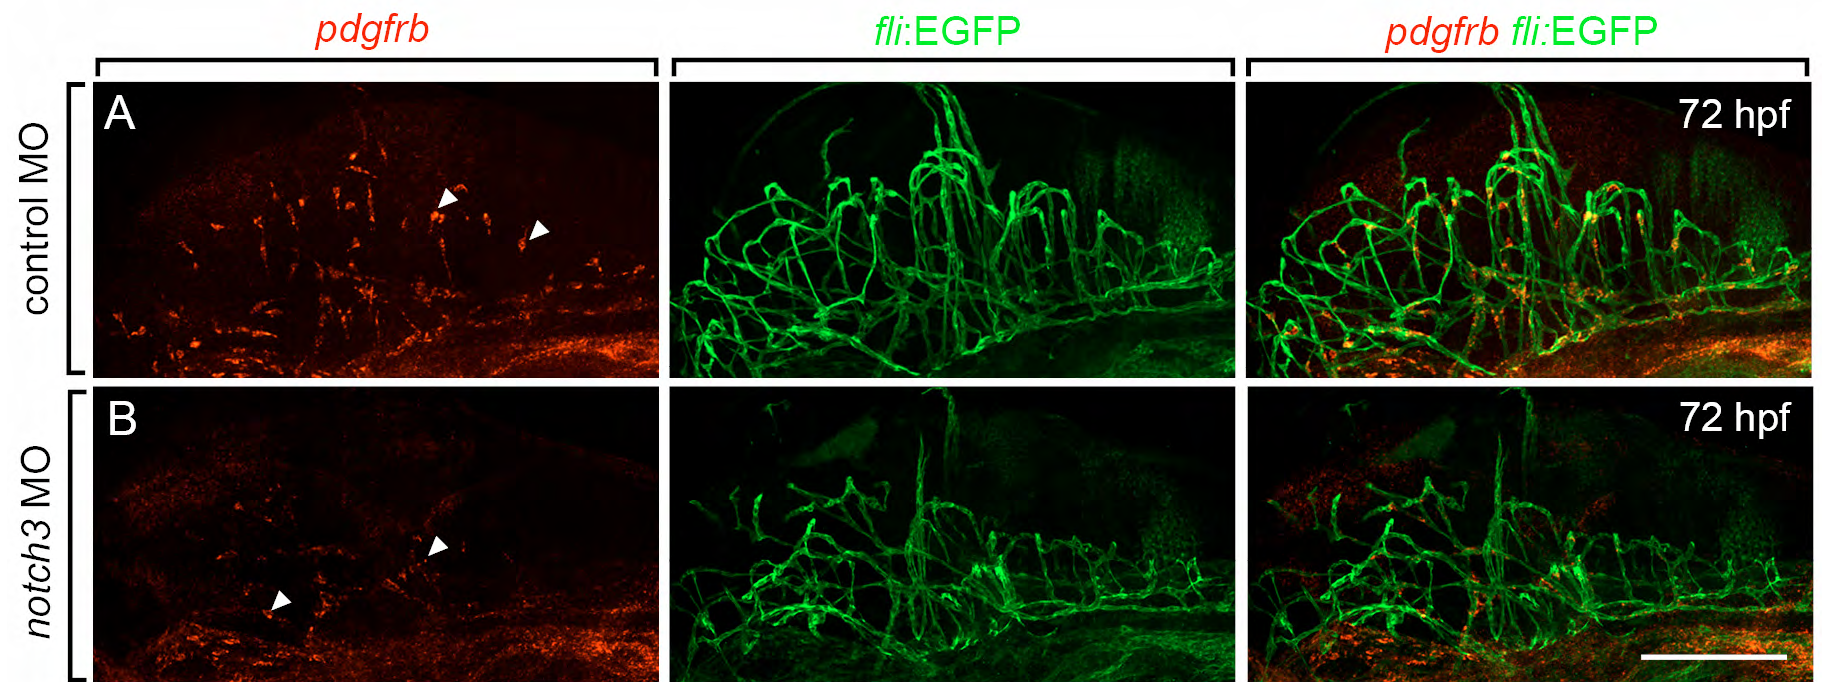

**Fig. S5. *notch3* MO phenocopied the pericyte deficit phenotype in *notch3<sup>fl332</sup>* mutant larvae.** (A,B) Fluorescent ISH showing *pdgfrb*<sup>+</sup> brain pericytes in 72 hpf control and *notch3* MO-injected larvae. Arrowheads, *pdgfrb*<sup>+</sup> pericytes. Scale bar, 200  $\mu$ m.

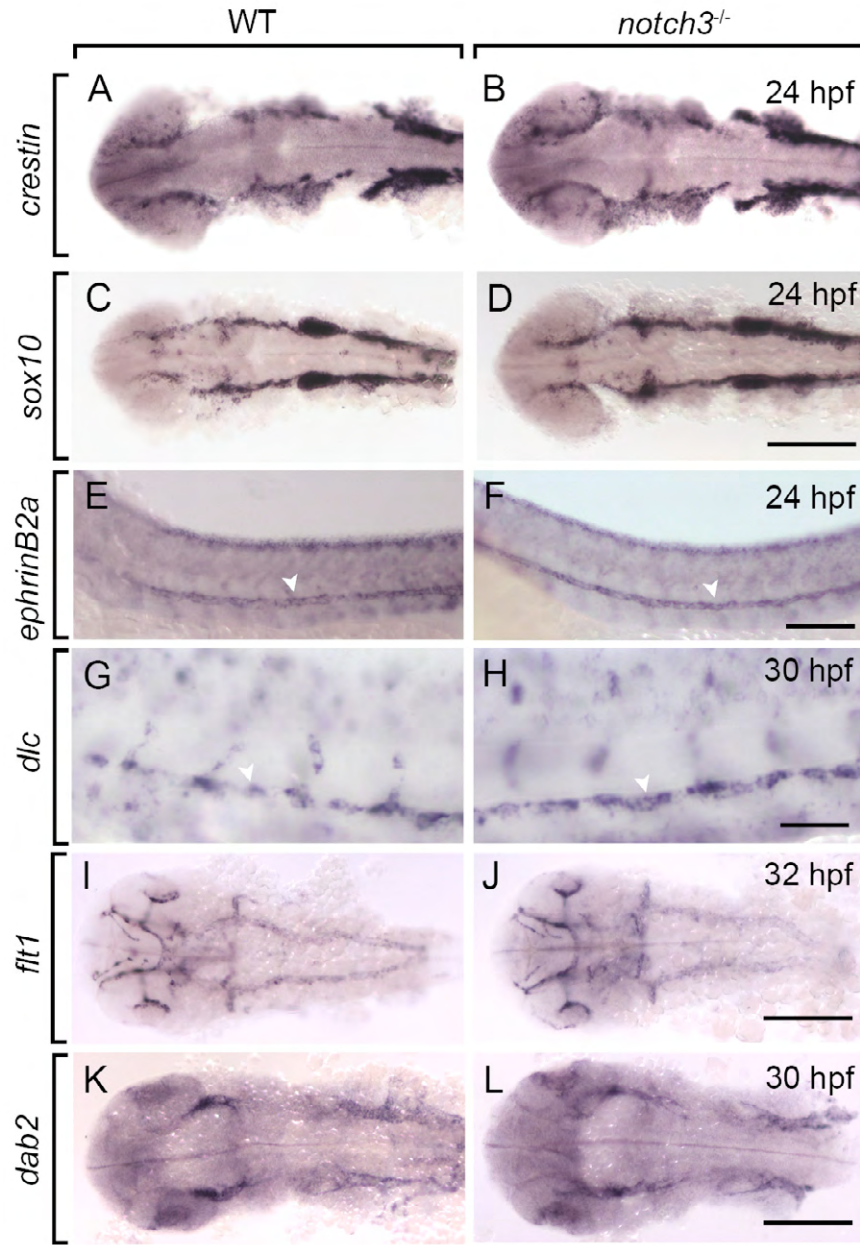

**Fig. S6. Arterial-venous differentiation and neural crest development in *notch3*<sup>fh332</sup> mutant larvae.** (A-D) ISH showing *crestin* and *sox10* expression in 24 hpf wild-type and *notch3*<sup>fh332</sup> mutant larvae. (E,F) ISH showing *efnb2a* expression in 24 hpf wild-type and *notch3*<sup>fh332</sup> mutant larvae. (G,H) ISH showing *dlc* expression in 30 hpf wild-type and *notch3*<sup>fh332</sup> mutant larvae. Arrowheads, DA. (I,J) ISH showing *flt1* expression in 32 hpf wild-type and *notch3*<sup>fh332</sup> mutant larvae. (K,L) ISH showing *dab2* expression in 30 hpf wild-type and *notch3*<sup>fh332</sup> mutant larvae. Scale bars: (A-F) 0.5 mm, (G,H) 200  $\mu$ m. (I-L) 0.5mm.



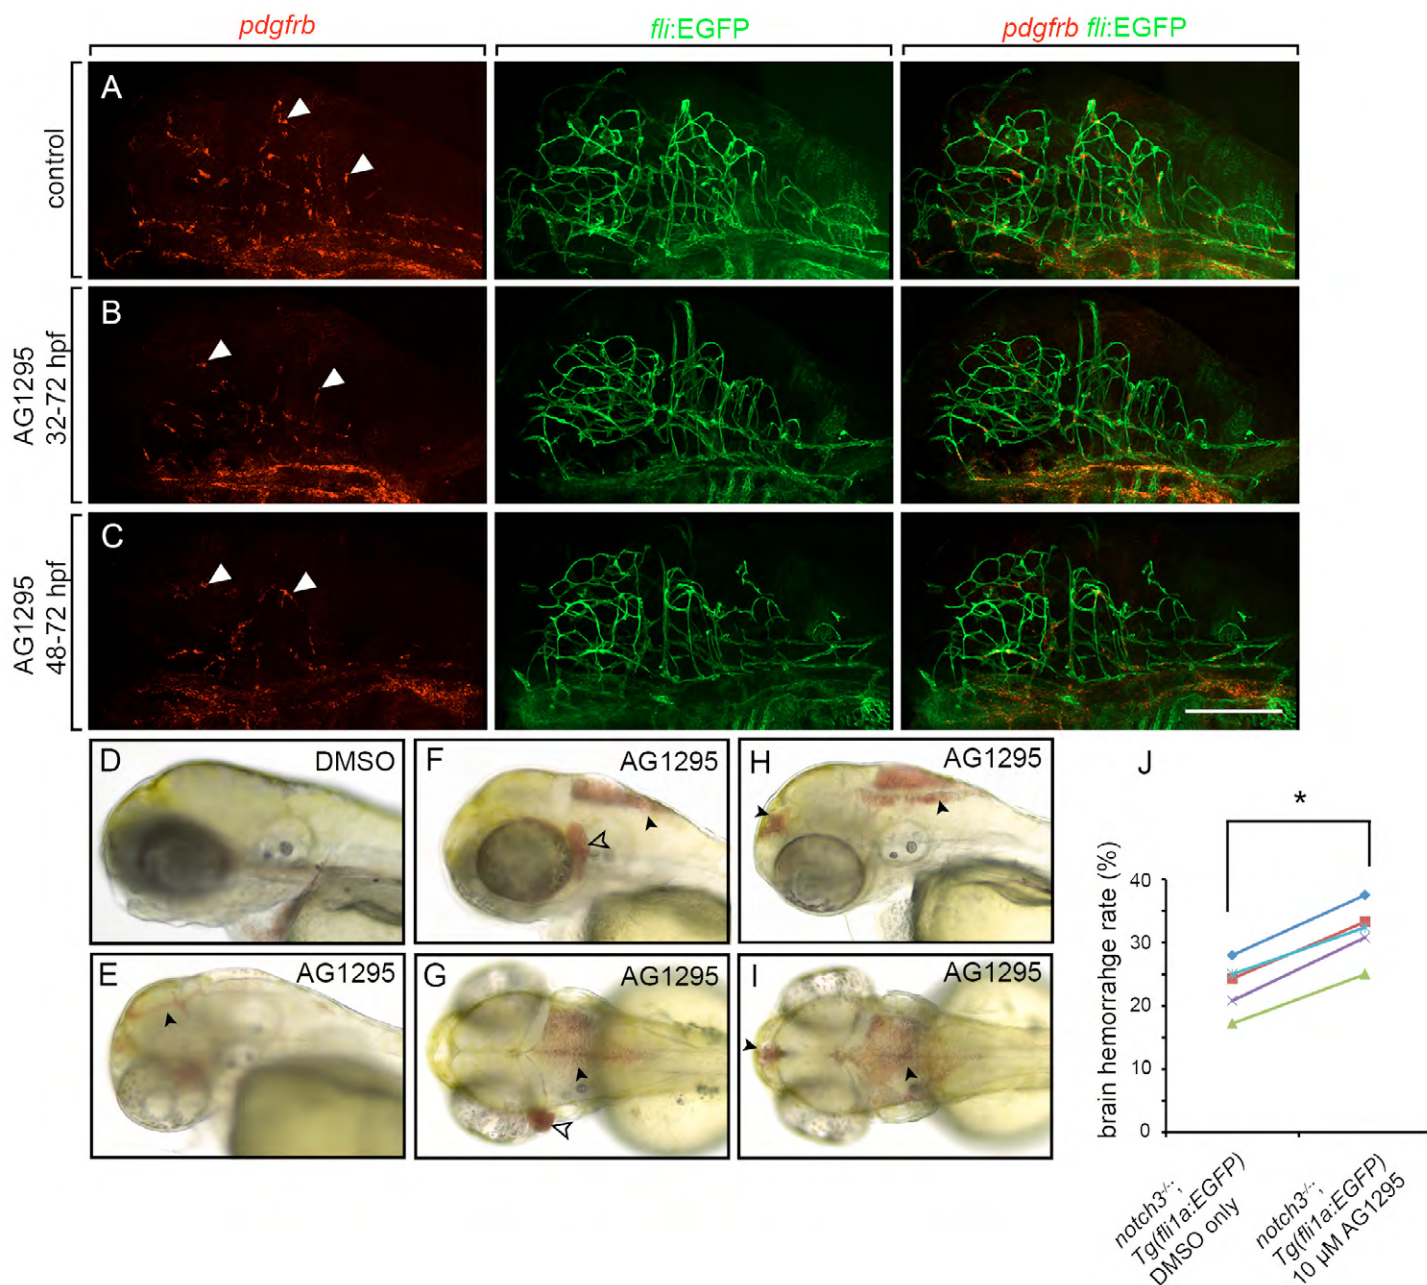

**Fig. S7. Inhibition of Pdgfr- $\beta$  activity produces a pericyte deficit and brain hemorrhage.** (A) *pdgfrb*<sup>+</sup> brain pericytes in DMSO treated control larvae. (B,C) Larvae treated with 25  $\mu$ M AG1295 from 32-72 hpf, and from 48-72 hpf, respectively, showed a reduction in *pdgfrb*<sup>+</sup> brain pericyte number. Arrowheads, *pdgfrb*<sup>+</sup> brain pericytes. Scale bar, 200  $\mu$ m. (A-C) All images show confocal projections of whole brains, viewed from lateral. (D-I) Brain hemorrhage in AG1295 treated zebrafish larvae. (D) DMSO treated control at 3 dpf. (F-I) 25  $\mu$ M AG1295 treated larva at 3 dpf. (E,F,H) Lateral views. (G,I) Dorsal views of (F,H), respectively. (J) *notch3*<sup>fl<sup>332</sup></sup> homozygous mutants showed a more penetrant hemorrhage phenotype when treated with 10  $\mu$ M AG1295 ( $n=5$ ,  $*P<0.05$ , by paired t-test). Arrowheads, blood pooling at the brain ventricle; open arrowhead, blood pooling behind the eye.

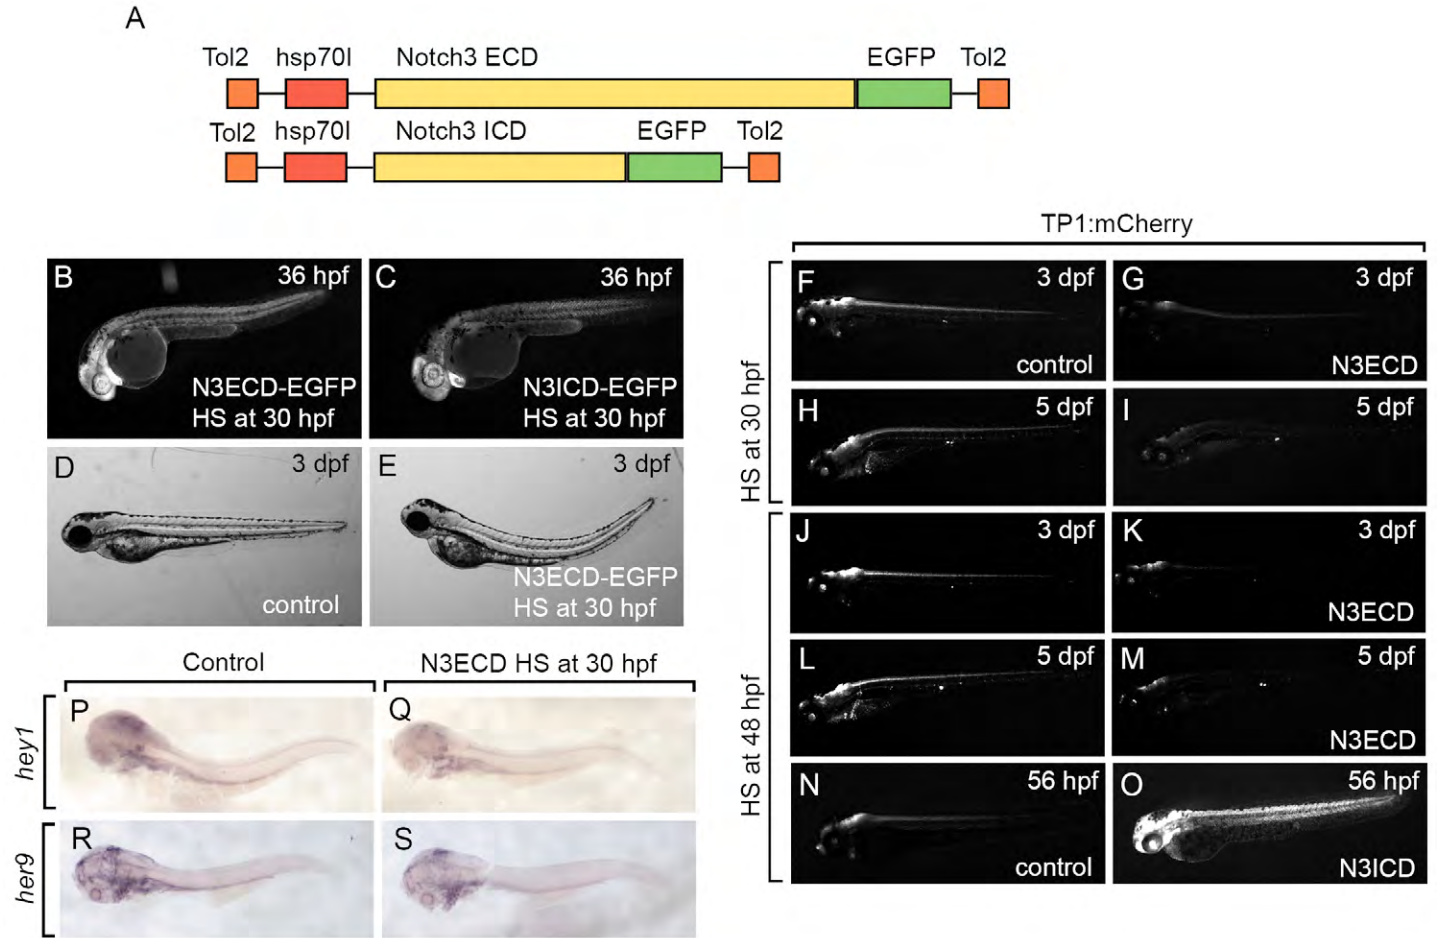

**Fig. S8. Organization and transgene expression for *Tg(hsp70I:Notch3ECD-EGFP)* and *Tg(hsp70I:Notch3ICD-EGFP)* transgenic constructs.** (A) Diagram depicting the organization of *Tg(hsp70I:Notch3ECD-EGFP)* and *Tg(hsp70I:Notch3ICD-EGFP)* transgenic constructs. (B,C) Heat shock of *Tg(hsp70I:Notch3ECD-EGFP)* embryos (B) and *Tg(hsp70I:Notch3ICD-EGFP)* embryos (C) at 30 hpf induced robust EGFP expression. (D,E) Heat shock of *Tg(hsp70I:Notch3ECD-EGFP)* embryos at 30 hpf resulted in trunk curvature at 3 dpf. (F-M) Heat shock of *Tg(hsp70I:Notch3ECD-EGFP)*; *Tg(Tp1bglob:hmgbl-mCherry)* embryos at 48 hpf or 30 hpf caused significant reduction in mCherry intensity at 3 dpf and 5 dpf. (N,O) Heat shock of *Tg(hsp70I:Notch3ICD-EGFP)*; *Tg(Tp1bglob:hmgbl-mCherry)* embryos at 48 hpf resulted in significantly increased mCherry fluorescent intensity at 56 hpf. (P-S) *Tg(hsp70I:N3ECD-EGFP)* larvae heat-shocked at 30 hpf showed reduced *hey1* and *her9* expression compared to control group.



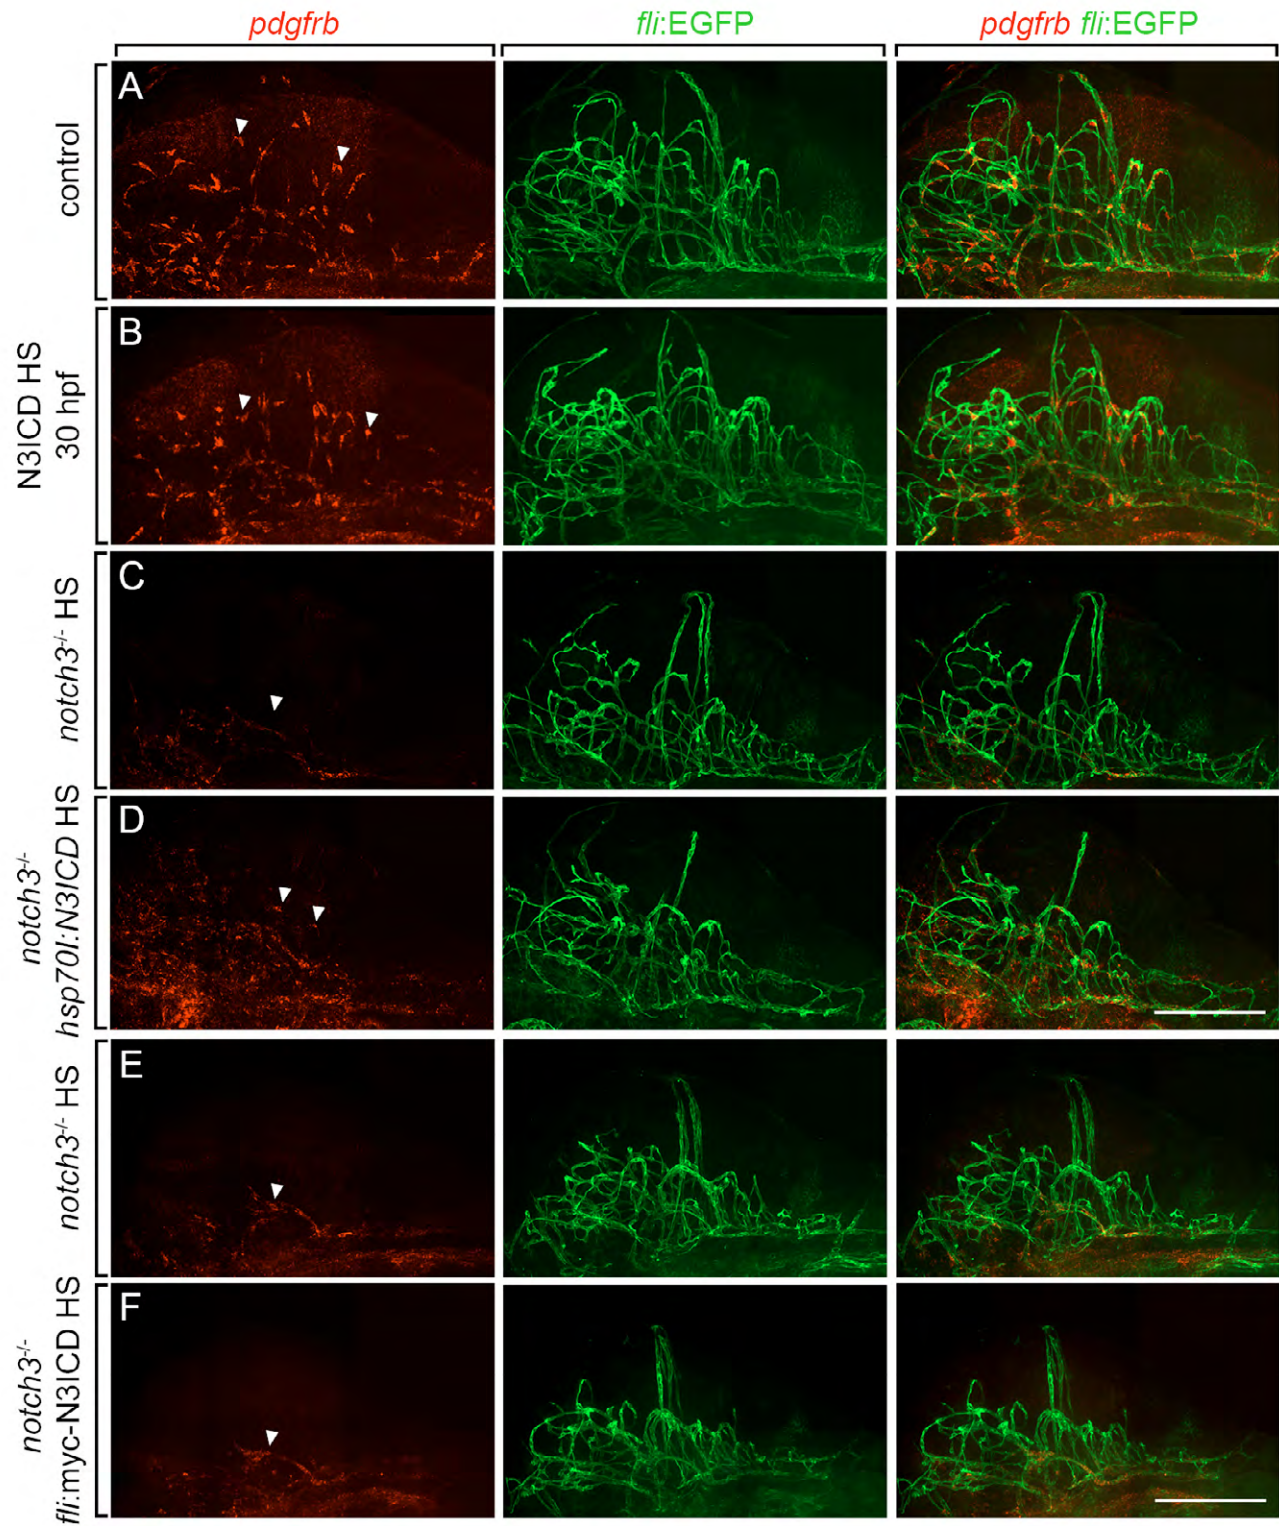

**Fig. S9. Notch3 is insufficient to induce ectopic brain pericyte specification and forced Notch3ICD expression in the endothelium failed to rescue the pericyte deficit in *notch3*<sup>fh332</sup> larvae.** (A,B) Heat shock of *Tg(hsp70l:Notch3ICD-EGFP)* embryos at 30 hpf did not result in increase of brain pericyte number at 72 hpf. (A) Non-transgenic control larvae. (B) *Tg(hsp70l:N3ICD-EGFP)* larva heat shocked at 30 hpf. (C,D) Transient N3ICD overexpression partially rescued the brain pericyte deficit phenotype in *notch3*<sup>fh332</sup> mutant larvae at 72 hpf. (C) *notch3*<sup>fh332</sup> mutant mock-injected control. (D) *notch3*<sup>fh332</sup> mutant injected with *hsp70l:N3ICD-EGFP* construct and heatshocked at 48 hpf. (E,F) Transient *N3ICD* expression in endothelial cells failed to rescue the brain pericyte deficit phenotype in *notch3*<sup>fh332</sup> mutant larvae. (E) *notch3*<sup>fh332</sup> mutant mock-injected control. (F) *notch3*<sup>fh332</sup> mutant injected with *fli1:myc-Notch3ICD* construct and heat shocked at 48 hpf. Arrowheads, *pdgfrb*<sup>+</sup> brain pericytes. Scale bar, 200  $\mu$ m.

**Table S1. Brain hemorrhage phenotype in *notch3<sup>fh332</sup>* larvae, *notch3* MO treated larvae, *foxd3* MO treated larvae, and AG1295 treated larvae.**

| Genotype or treatment                                          | Hemorrhage rate |
|----------------------------------------------------------------|-----------------|
| <i>notch3<sup>fh332</sup></i>                                  | 10% (n = 30)    |
|                                                                | 6.25% (n = 32)  |
|                                                                | 12.5% (n = 40)  |
|                                                                | 19.5% (n= 87)   |
| <i>notch3<sup>fh332</sup>;Tg(fli1a:EGFP)</i>                   | 25% (n = 56)    |
|                                                                | 24.4% (n = 45)  |
|                                                                | 19.4% (n = 31)  |
|                                                                | 28.9% (n = 76)  |
|                                                                | 12.5% (n = 48)  |
| control MO                                                     | 0 (n = 56)      |
|                                                                | 1.4% (n = 72)   |
|                                                                | 0 (n = 34)      |
| <i>notch3</i> MO                                               | 33.3% (n = 66)  |
|                                                                | 31.6% (n = 57)  |
|                                                                | 42.2% (n = 45)  |
| AB; 25 $\mu$ M AG1295 30 hpf to 72 hpf                         | 8.6% (n = 35)   |
|                                                                | 10.7% (n = 28)  |
| AB; 25 $\mu$ M AG1295 48 hpf to 72 hpf                         | 4.8% (n=21)     |
|                                                                | 10.8% (n = 37)  |
| <i>Tg(fli1a:EGFP)</i><br>25 $\mu$ M AG1295 30 hpf to 72 hpf    | 25% (n=60)      |
|                                                                | 23.1% (n= 39)   |
|                                                                | 31.0% (n=42)    |
| <i>Tg(fli1a:EGFP)</i><br>25 $\mu$ M AG1295 48 hpf to 72 hpf    | 16.7% (n=30)    |
|                                                                | 19.3% (n = 31)  |
|                                                                | 25% (n=20)      |
| control MO                                                     | 0 (n = 48)      |
|                                                                | 0 (n = 52)      |
|                                                                | 0 (n = 63)      |
| <i>foxd3</i> MO                                                | 15.8% (n = 76)  |
|                                                                | 11.1% (n = 63)  |
|                                                                | 6.25% (n= 64)   |
| <i>notch3<sup>fh332</sup>;Tg(fli1a:EGFP)</i><br>raised at 28°C | 23.5% (n = 34)  |
|                                                                | 18.8% (n = 32)  |
|                                                                | 24.1% (n=29)    |
| <i>notch3<sup>fh332</sup>;Tg(fli1a:EGFP)</i><br>raised at 32°C | 55.6% (n = 36)  |
|                                                                | 50% (n = 36)    |
|                                                                | 66.7% (n=27)    |

|                                                                               |                |
|-------------------------------------------------------------------------------|----------------|
| <i>notch3<sup>fh332</sup>;Tg(fli1a:EGFP)</i><br>DMSO only, 30 hpf to 72 hpf   | 28% (n = 25)   |
|                                                                               | 24.3% (n =37)  |
|                                                                               | 17.2% (n=29)   |
|                                                                               | 20.8% (n=24)   |
|                                                                               | 25% (n=28)     |
| <i>notch3<sup>fh332</sup>;Tg(fli1a:EGFP)</i><br>10 μM AG1295 30 hpf to 72 hpf | 37.5% (n = 48) |
|                                                                               | 33.3% (n = 27) |
|                                                                               | 25% (n=32)     |
|                                                                               | 30.8% (n=26)   |
|                                                                               | 32.4% (n=34)   |
